# Supplementary material for: Strand-specific RNA-Seq transcriptome analysis of genotypes with and without low-phosphorus tolerance provides novel insights into phosphorus-use efficiency in maize
Source: PubMed Central journal article supplement (PMC5057381; doi:10.1186/s12870-016-0903-4), 2016-10-10

## Supplemental Figure 2

**A**

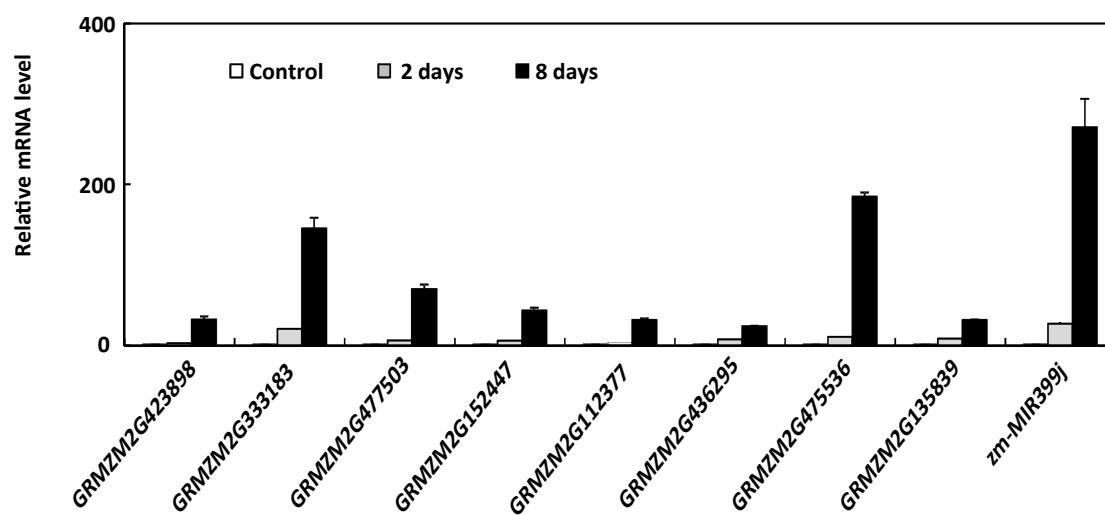

**B**

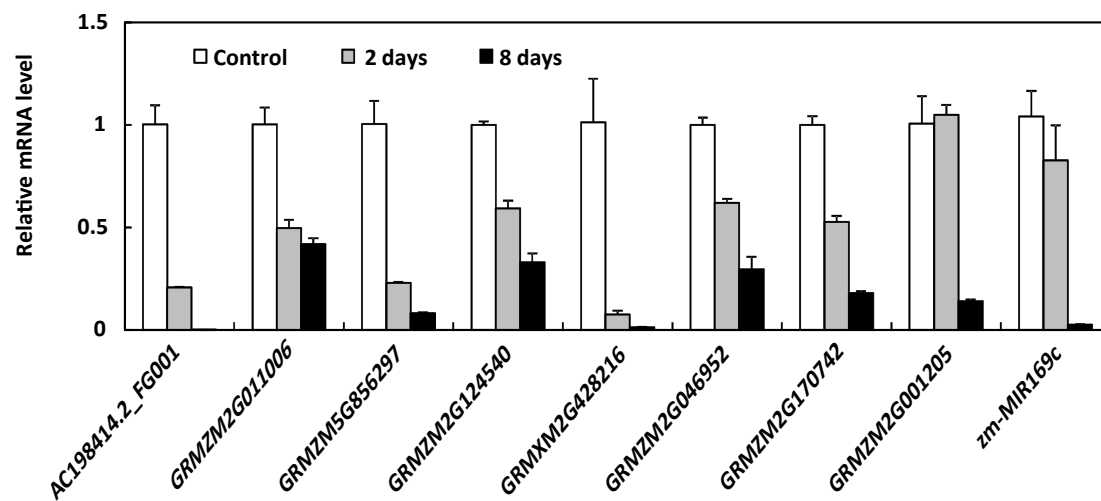

Supplement: 12870_2016_903_MOESM3_ESM.pdf [file 12870_2016_903_MOESM3_ESM.pdf]
